# Supplementary material
Source: PubMed Central journal article supplement (PMC4790013)
Supplement: robm001759.ww1_default.pdf [file robm001759.ww1_default.pdf]

Overview of secondary outcomes

| Outcome domain                                                      |                                                                                                                        | Patient reported | Parent reported |      |
|---------------------------------------------------------------------|------------------------------------------------------------------------------------------------------------------------|------------------|-----------------|------|
|                                                                     |                                                                                                                        |                  | Patient Proxy   | Self |
| <b>i) Standardised Measures</b>                                     |                                                                                                                        |                  |                 |      |
|                                                                     | <b>Measure name and citation</b>                                                                                       |                  |                 |      |
| Health-related QoL                                                  | PedsQL <sup>25</sup> ( <i>Problems with: Treatment barriers; Symptoms; Treatment adherence; Worry; Communication</i> ) | Ages 11+         | Ages <11        | Yes  |
|                                                                     | Problem Areas In Diabetes <sup>26</sup>                                                                                | Ages 11+         | Ages <11        | Yes  |
| Self-efficacy                                                       | Patient Enablement <sup>27</sup>                                                                                       | Ages 11+         |                 | Yes  |
| Perceptions of provider                                             | Health Care Climate Questionnaire <sup>28</sup>                                                                        | Ages 7+          |                 | Yes  |
|                                                                     | Diabetes Continuity of Care Scale <sup>29</sup>                                                                        | Ages 7+          |                 | Yes  |
| Self-care                                                           | Mismanagement <sup>30</sup>                                                                                            | Ages 11+         | Ages 7+         |      |
| <b>ii) Bespoke and single item measures</b>                         |                                                                                                                        |                  |                 |      |
|                                                                     | <b>Measure description</b>                                                                                             |                  |                 |      |
| Importance & confidence in carrying out diabetes-related behaviours | 2 measures, each with 6 items                                                                                          | Ages 11+         |                 | Yes  |
| Blood glucose checks (>4 times per day)                             | Single item measure                                                                                                    | Ages 11+         |                 | Yes  |
| Emotional experience of clinic                                      | 5 single items: Fed up, Excited, Guilty, Good, Worried                                                                 | Ages 7+          |                 | Yes  |
| Ease of living with diabetes                                        | Single item                                                                                                            | Ages 7+          |                 | Yes  |
| Quality of life                                                     | 2 items: In general; Compared to last year                                                                             | Ages 7+          |                 | Yes  |
